# Supplementary material for: Nanoparticle surface charge influences translocation and leaf distribution in vascular plants with contrasting anatomy
Source: Royal Society of Chemistry journal article supplement (doi:10.1039/c9en00626e), 2019-01-01
Supplement: c9en00626e1.pdf [file c9en00626e1.pdf]

Supporting Information for:

**Nanoparticle surface charge influences uptake, translocation, and leaf distribution in vascular plants with contrasting anatomy**

Eleanor Spielman-Sun,<sup>a</sup> Astrid Avellan,<sup>a</sup> Garret D. Bland,<sup>a</sup> Ryan V. Tappero,<sup>b</sup> Alvin S. Acerbo,<sup>b</sup>  
Jason M. Unrine,<sup>c</sup> Juan Pablo Giraldo,<sup>d</sup> Gregory V. Lowry<sup>\*a</sup>

<sup>a</sup> Civil and Environmental Engineering, Carnegie Mellon University, Pittsburgh, Pennsylvania 15213, United States

<sup>b</sup> National Synchrotron Light Source II, Brookhaven National Laboratory, Upton, NY 11973, United States

<sup>c</sup> Department of Plant and Soil Sciences, University of Kentucky, Lexington, Kentucky 40546, United States

<sup>d</sup> Department of Botany and Plant Sciences, University of California, Riverside, CA 92521, United States

\*Corresponding author:

Address: Carnegie Mellon University, Pittsburgh, PA 15213

Phone: (412) 268-2948

Email: glowry@cmu.edu

Number of Pages: 18

Number of Figures: 14

Number of Tables: 3

**Table of Contents**

|                                                                                  |          |
|----------------------------------------------------------------------------------|----------|
| Figure S.1 – NP hydrodynamic diameters                                           | Page S2  |
| Table S.1 – Dissolved Ce in exposure solution post-exposure                      | Page S3  |
| Table S.2 – Total Ce uptake and root surface area approximations                 | Page S4  |
| Table S.3 – LCF fitting statistics for XANES of Roots                            | Page S5  |
| Figure S.2 – XRF maps of corn exposed to CeO <sub>2</sub> (–)                    | Page S6  |
| Figure S.3 – XRF maps of corn exposed to CeO <sub>2</sub> (0)                    | Page S7  |
| Figure S.4 – XRF maps of rice exposed to CeO <sub>2</sub> (–)                    | Page S8  |
| Figure S.5 – XRF maps of rice exposed to CeO <sub>2</sub> (0)                    | Page S9  |
| Figure S.6 – XRF maps of lettuce exposed to CeO <sub>2</sub> (–)                 | Page S10 |
| Figure S.7 – XRF maps of lettuce exposed to CeO <sub>2</sub> (0)                 | Page S11 |
| Figure S.8 – XRF maps of tomato exposed to CeO <sub>2</sub> (–)                  | Page S12 |
| Figure S.9 – Large tri-colored XRF map of tomato exposed to CeO <sub>2</sub> (–) | Page S13 |
| Figure S.10 – XRF maps of tomato exposed to CeO <sub>2</sub> (0)                 | Page S14 |
| Figure S.11 – XRF maps of lettuce exposed to CeO <sub>2</sub> (+)                | Page S15 |
| Figure S.12 – XRF maps of lettuce exposed to CeO <sub>2</sub> (+)                | Page S16 |
| Figure S.13 – XRF maps of tomato exposed to CeO <sub>2</sub> (0)                 | Page S17 |
| Figure S.14 – XRF map of Ce accumulation in tomato trichomes                     | Page S18 |

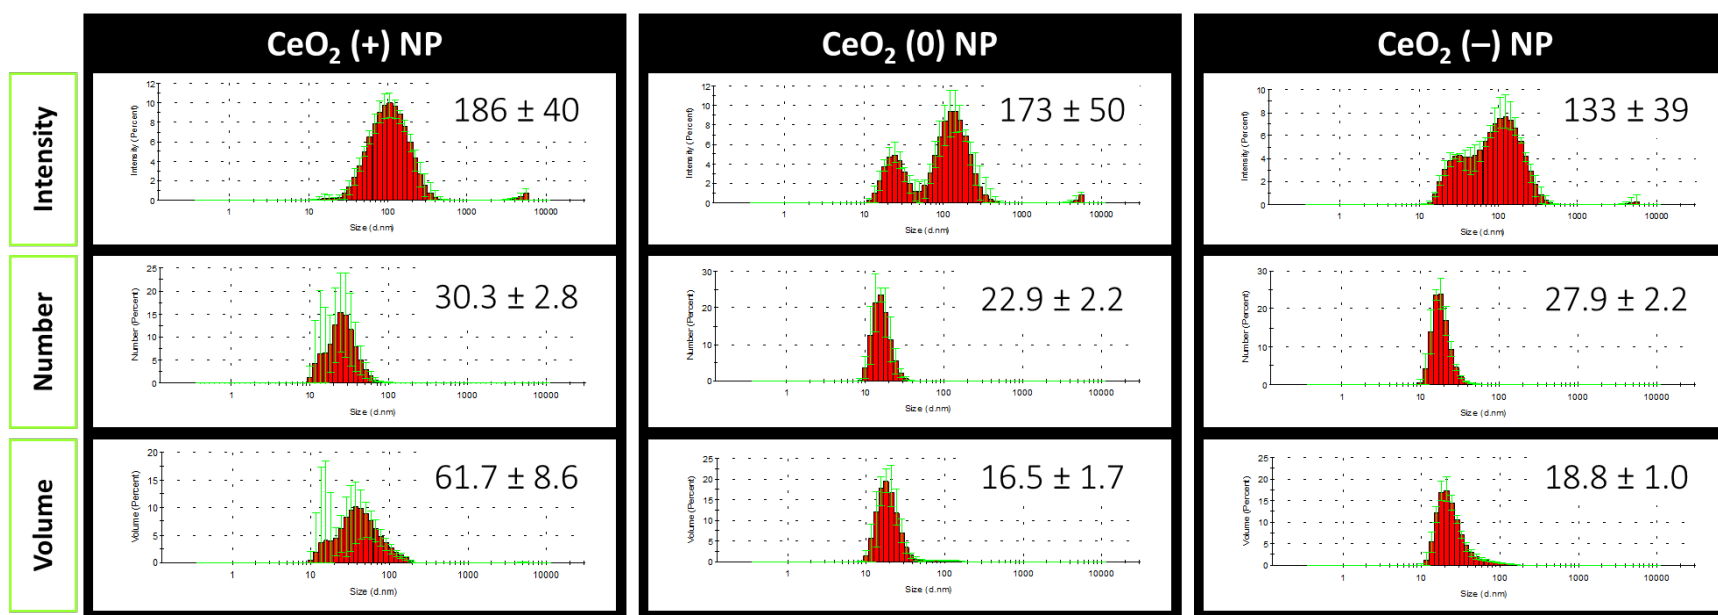

**Figure S1.** Intensity, number, and volume weighted distributions of the hydrodynamic diameters (nm) of CeO<sub>2</sub>(+), CeO<sub>2</sub>(0), and CeO<sub>2</sub>(-) NPs at 50 mg-Ce/L in exposure medium (basal salt solution, pH=5.6). Values are presented with standard deviation over 5 replicates.

**Table S1:** Dissolved fraction of Ce remaining in solution after 48 h of hydroponic exposure to 50 mg-Ce/L as CeO<sub>2</sub>(+), CeO<sub>2</sub>(0) or CeO<sub>2</sub>(-) NPs. The dissolved fraction was calculated as a percent of Ce concentration in ultra-filtered (3 kDa cutoff) suspensions divided by the total Ce concentration of the solution. Measurements were made in triplicate. Majority of the remaining Ce is not dissolved.

|         | Positive      | Neutral       | Negative      |
|---------|---------------|---------------|---------------|
| Corn    | 0.14 ± 0.08 % | 0.02 ± 0.01 % | 0.01 ± 0.01 % |
| Rice    | 0.04 ± 0.01 % | 0.00 ± 0.01 % | 0.05 ± 0.01 % |
| Tomato  | 0.04 ± 0.01 % | 0.04 ± 0.01 % | 0.02 ± 0.01 % |
| Lettuce | 0.12 ± 0.01 % | 0.03 ± 0.01 % | 0.01 ± 0.01 % |

**Table S2:** Total Ce concentrations on/in dried plant roots after 48 h of hydroponic exposure to 50 mg-Ce/L as CeO<sub>2</sub>(+), CeO<sub>2</sub>(0) or CeO<sub>2</sub>(-) NPs. The reported values are means averaged from four replicates  $\pm$  SD. Plant root surface area (SA) approximations were also averaged over four sets of plant roots per species.

| Plant Species | Root SA (cm <sup>2</sup> ) | NP Surface Charge | Ce association with roots (mg/kg) |
|---------------|----------------------------|-------------------|-----------------------------------|
| Corn          | 6.6 $\pm$ 1.2              | (+)               | 13,640 $\pm$ 7,200                |
|               |                            | (0)               | 5,730 $\pm$ 2,270                 |
|               |                            | (-)               | 3,700 $\pm$ 1,110                 |
| Rice          | 0.6 $\pm$ 0.2              | (+)               | 20,780 $\pm$ 6,380                |
|               |                            | (0)               | 2,230 $\pm$ 500                   |
|               |                            | (-)               | 1,470 $\pm$ 670                   |
| Tomato        | 11.3 $\pm$ 3.2             | (+)               | 47,330 $\pm$ 3,100                |
|               |                            | (0)               | 11,640 $\pm$ 1,320                |
|               |                            | (-)               | 2,410 $\pm$ 1,450                 |
| Lettuce       | 1.3 $\pm$ 1.0              | (+)               | 31,530 $\pm$ 4,690                |
|               |                            | (0)               | 1,470 $\pm$ 670                   |
|               |                            | (-)               | 1,150 $\pm$ 770                   |



**Table S3:** Ce L<sub>III</sub> XANES linear combination fitting (LCF) results of roots after 48 h of hydroponic exposure to 50 mg-Ce/L as CeO<sub>2</sub>(+), CeO<sub>2</sub>(0) or CeO<sub>2</sub>(−) NPs. Roots were rinsed for 30s in Ce-free medium prior to lyophilization and analysis. Spectra are shown in **Figure 4**.

|               | <b>Positive</b> |        |        |         | <b>Neutral</b> |        |        |         | <b>Negative</b> |        |        |         |
|---------------|-----------------|--------|--------|---------|----------------|--------|--------|---------|-----------------|--------|--------|---------|
|               | Corn            | Rice   | Tomato | Lettuce | Corn           | Rice   | Tomato | Lettuce | Corn            | Rice   | Tomato | Lettuce |
| Ce(III)       | -               | -      | -      | -       | 18.0%          | 10.5%  | 18.8%  | 31.5%   | -               | 7.6%   | 10.4%  | 23.9%   |
| Ce(IV)        | 98.8%           | 96.9%  | 100.5% | 89.4%   | 88.5%          | 89.8%  | 87.9%  | 80.6%   | 105.5%          | 94.3%  | 93.7%  | 85.8%   |
| R Factor      | 0.0025          | 0.0008 | 0.0007 | 0.0035  | 0.0018         | 0.0018 | 0.0015 | 0.0094  | 0.0026          | 0.0032 | 0.0024 | 0.1910  |
| Red. $\chi^2$ | 0.0011          | 0.0003 | 0.0004 | 0.0017  | 0.0008         | 0.0007 | 0.0084 | 0.0048  | 0.0013          | 0.0013 | 0.0014 | 0.0410  |

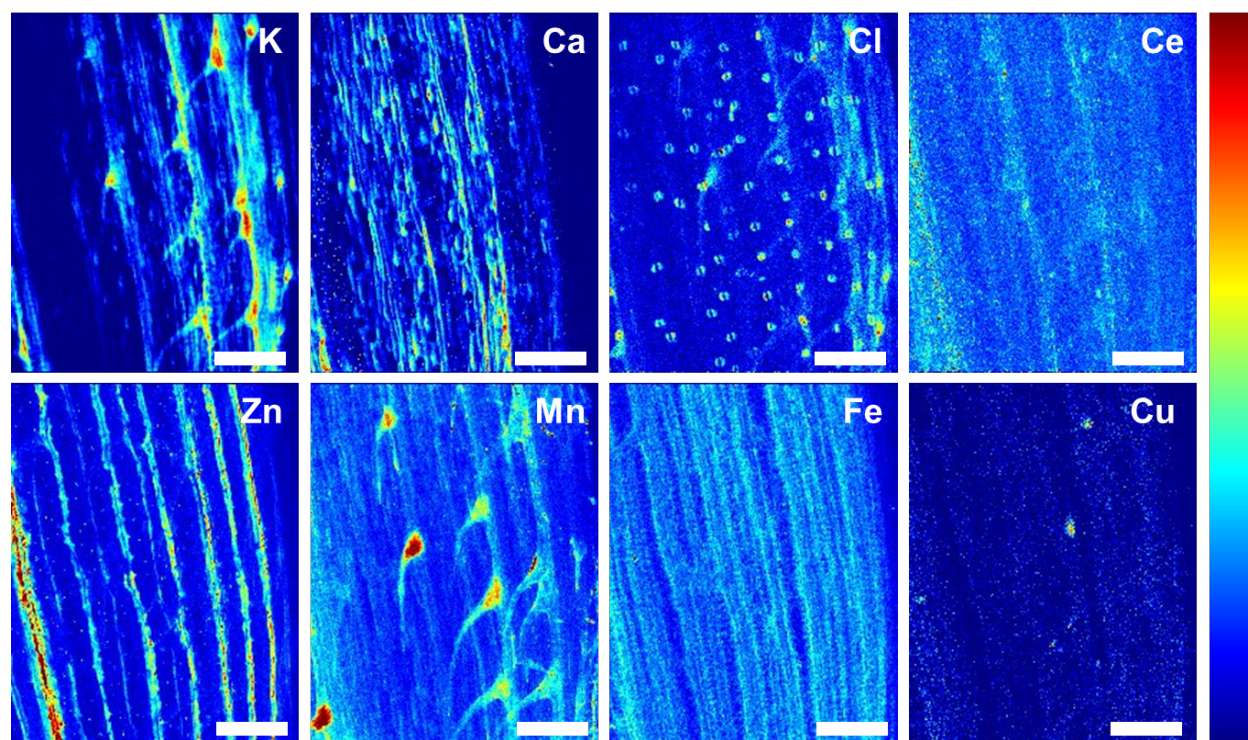

**Figure S2.** XRF maps showing elemental distribution in a corn leaf after 48 h of hydroponic exposure to 50 mg-Ce/L as  $\text{CeO}_2(-)$  NPs. Ce signal was not sufficient to perform  $\mu$ -XANES. Scale bar=200  $\mu\text{m}$ .

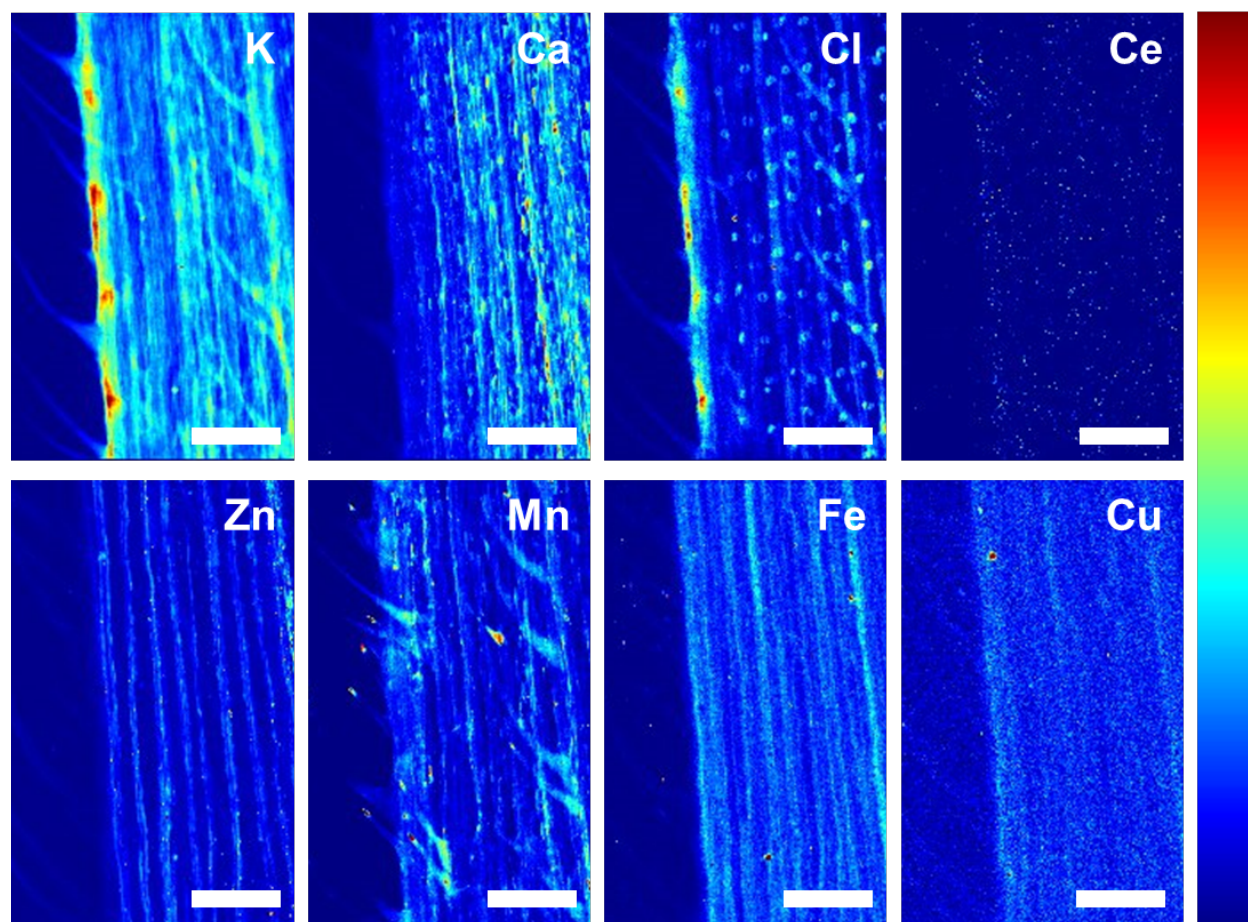

**Figure S3.** XRF maps showing elemental distributions in a corn leaf after 48 h of hydroponic exposure to 50 mg-Ce/L as  $\text{CeO}_2(0)$  NPs. Ce signal was not sufficient to perform  $\mu$ -XANES. Scale bar=200  $\mu\text{m}$ .



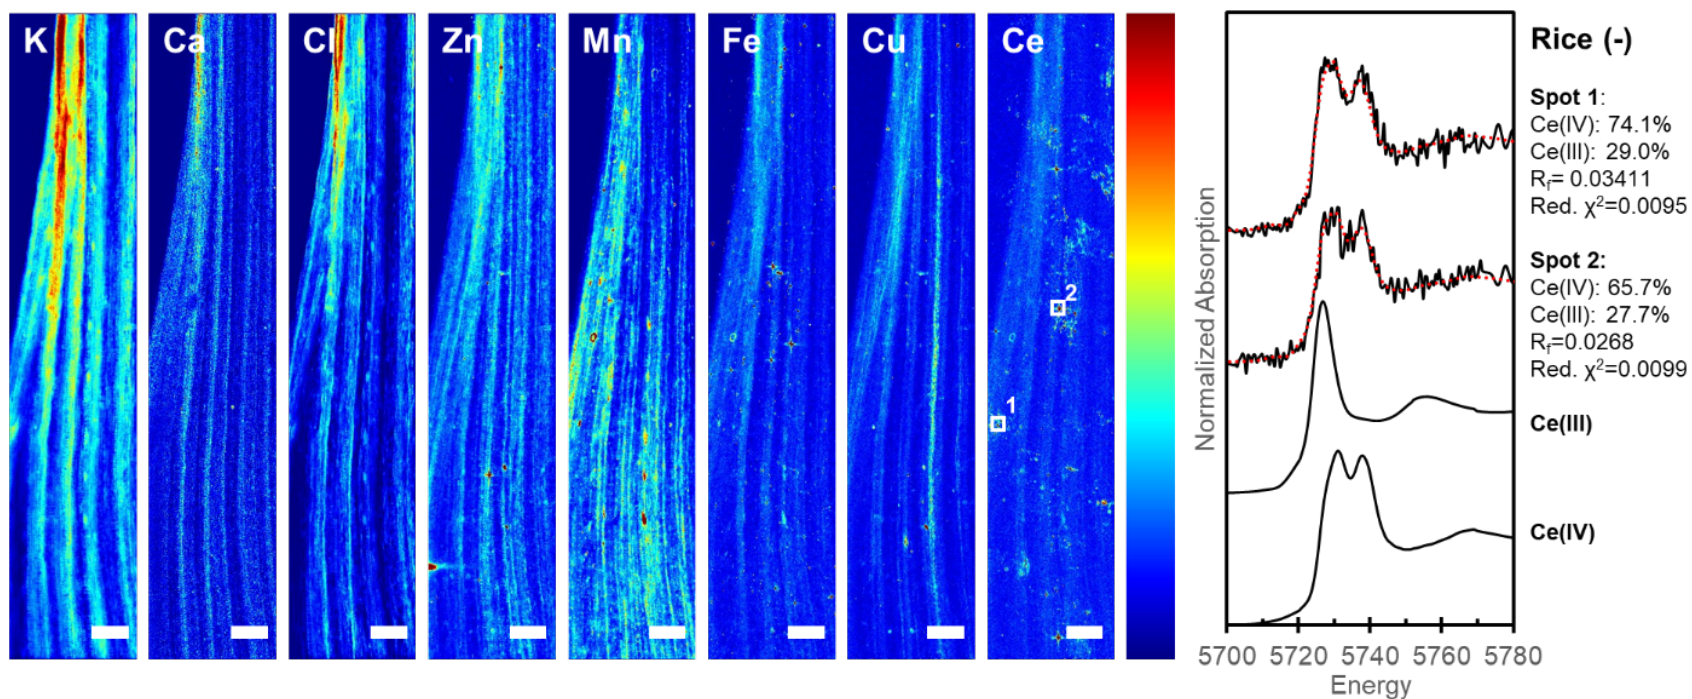

**Figure S4.** XRF maps showing elemental distributions in a rice leaf after 48 h of hydroponic exposure to 50 mg-Ce/L as CeO<sub>2</sub>(-) NPs. Ce L(III)  $\mu$ -XANES spectra (solid, black) from high intensity spots are indicated with white boxes on the Ce map. LCF results (dotted, red) are presented with fitting statistics and Ce(III) and Ce(IV) model compounds. Scale bar=200  $\mu$ m

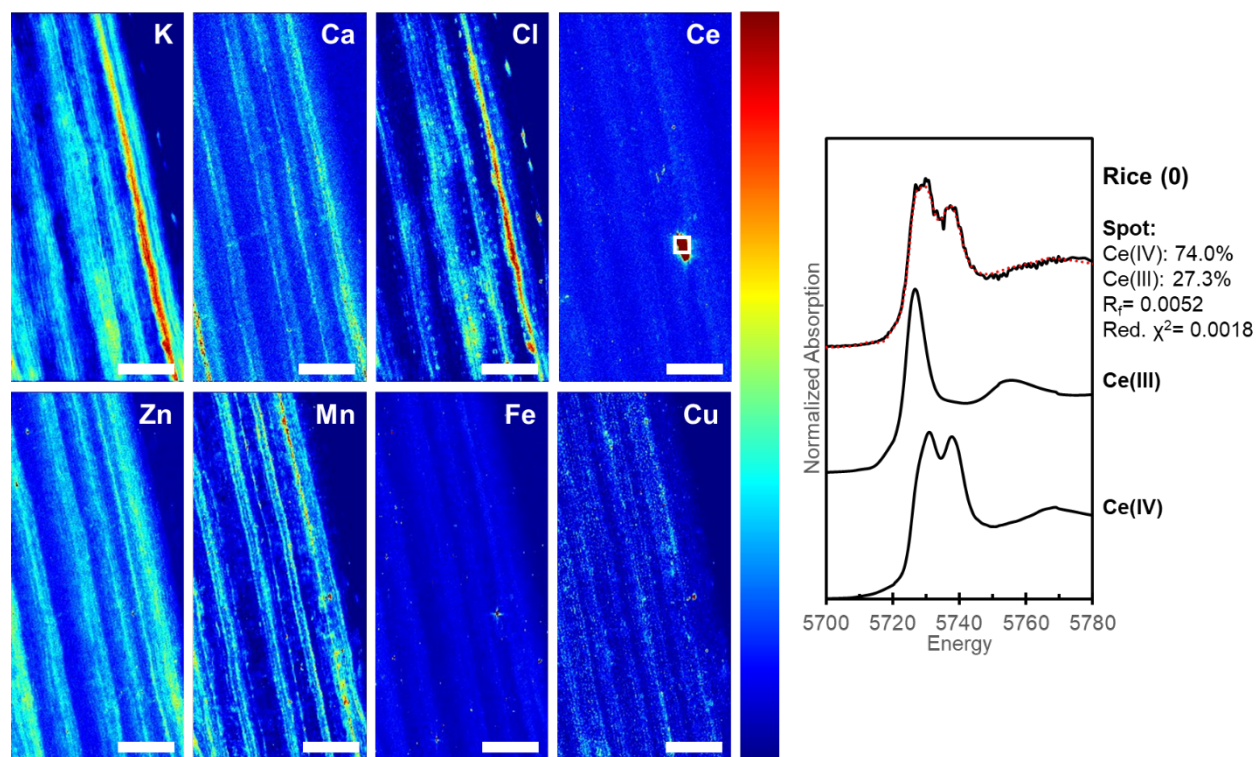

**Figure S5.** XRF maps showing elemental distributions in a rice leaf after 48 h of hydroponic exposure to 50 mg-Ce/L as  $\text{CeO}_2(0)$  NPs. Ce L(III)  $\mu$ -XANES spectrum (solid, black) from high intensity spot is indicated with a white box on the Ce map. LCF result (dotted, red) is presented with fitting statistics and Ce(III) and Ce(IV) model compounds. Scale bar=200  $\mu$

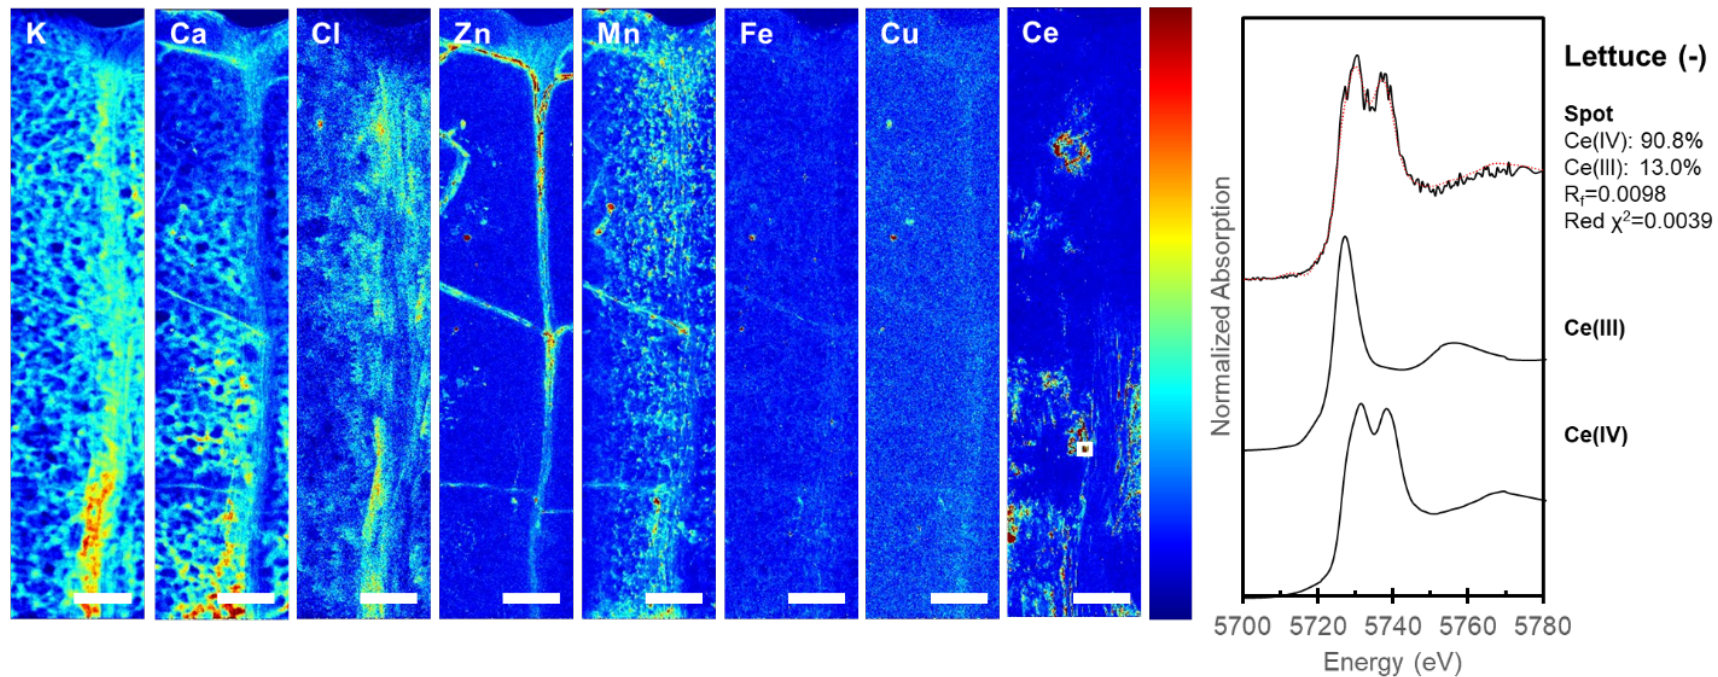

**Figure S6.** XRF maps showing elemental distribution in a lettuce leaf after 48 h of hydroponic exposure to 50 mg-Ce/L as  $\text{CeO}_2(-)$  NPs. Ce L(III)  $\mu$ -XANES spectrum (solid, black) from high intensity spot is indicated with a white box on the Ce map. LCF result (dotted, red) is presented with fitting statistics and Ce(III) and Ce(IV) model compounds. Scale bar=200  $\mu\text{m}$ .



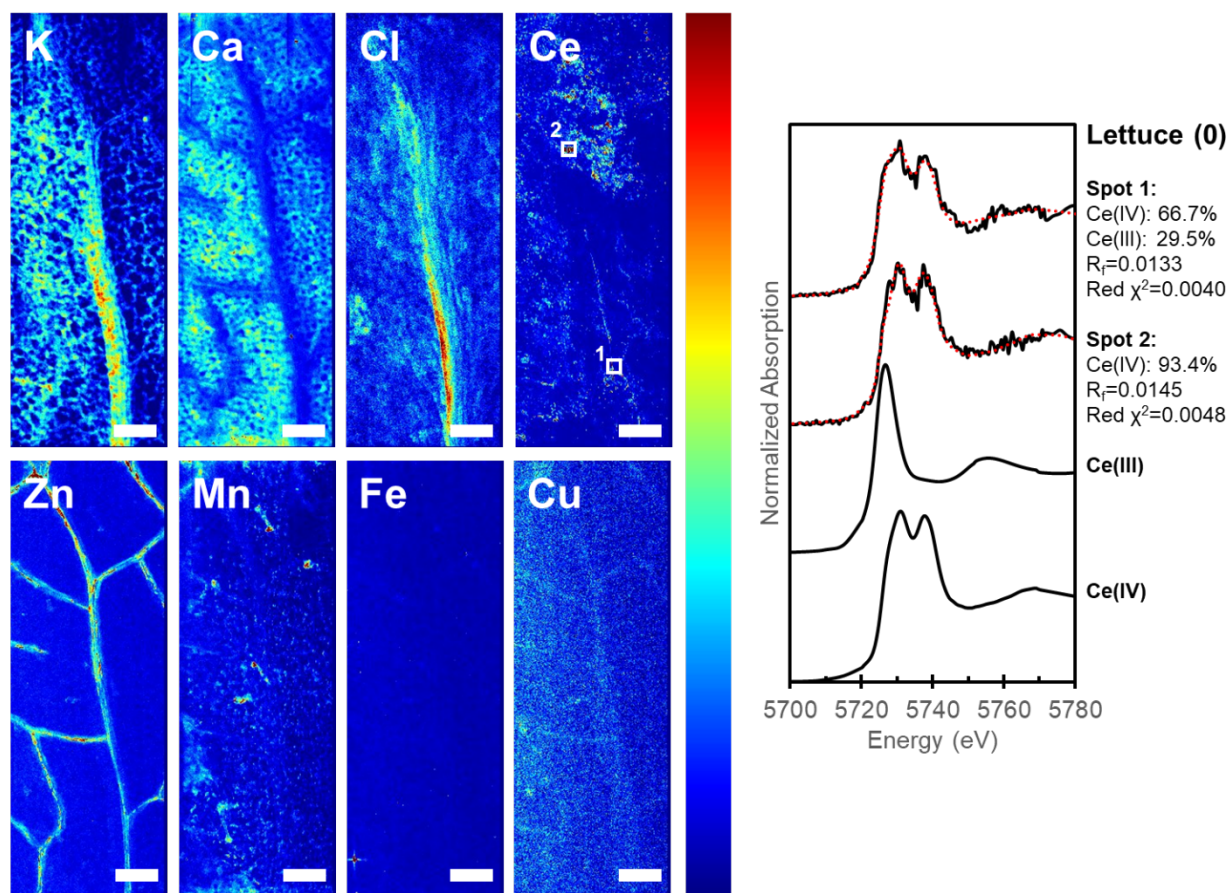

**Figure S7.** XRF maps showing elemental distribution in a lettuce leaf after 48 h of hydroponic exposure to 50 mg-Ce/L as  $\text{CeO}_2(0)$  NPs. Ce L(III)  $\mu$ -XANES spectra (solid, black) from high intensity spots are indicated with white boxes on the Ce map. LCF results (dotted, red) are presented with fitting statistics and Ce(III) and Ce(IV) model compounds. Scale bar=200  $\mu\text{m}$ .

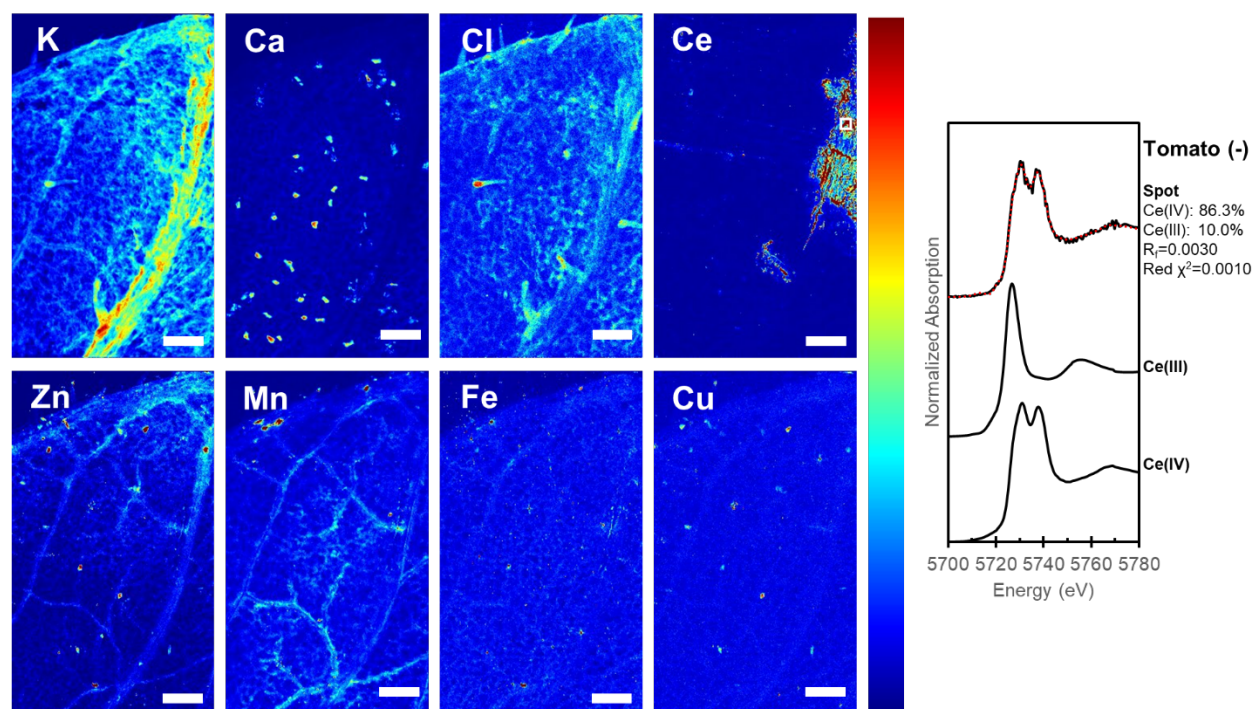

**Figure S8.** XRF maps showing elemental distributions in a tomato leaf after 48 h of hydroponic exposure to 50 mg-Ce/L as  $\text{CeO}_2$  (-) NP. Ce L(III)  $\mu$ -XANES spectrum (solid, black) from high intensity spot is indicated with a white box on the Ce map. LCF result (dotted, red) is presented with fitting statistics and Ce(III) and Ce(IV) model compounds. Scale bar=200  $\mu\text{m}$



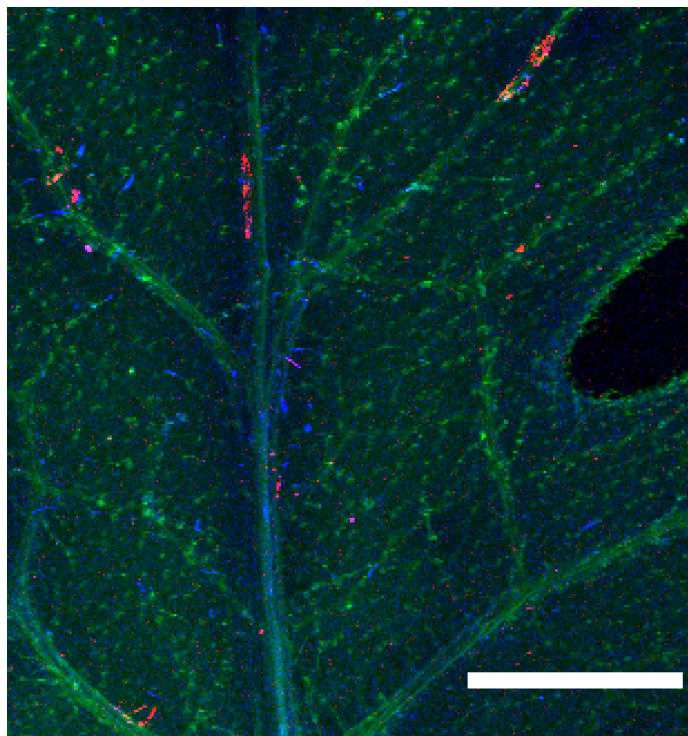

**Figure S9.** Tri-colored XRF map showing Ce (red), K (green), and Mn (blue) distributions in a tomato leaf after 48 h of hydroponic exposure to 50 mg-Ce/L as CeO<sub>2</sub> (–) NP. Collected at NSLS-II on BL 4-BM. Elemental maps were collected using a step size of 15  $\mu$ m and a dwell time of 0.1 s. Scale bar=1 mm

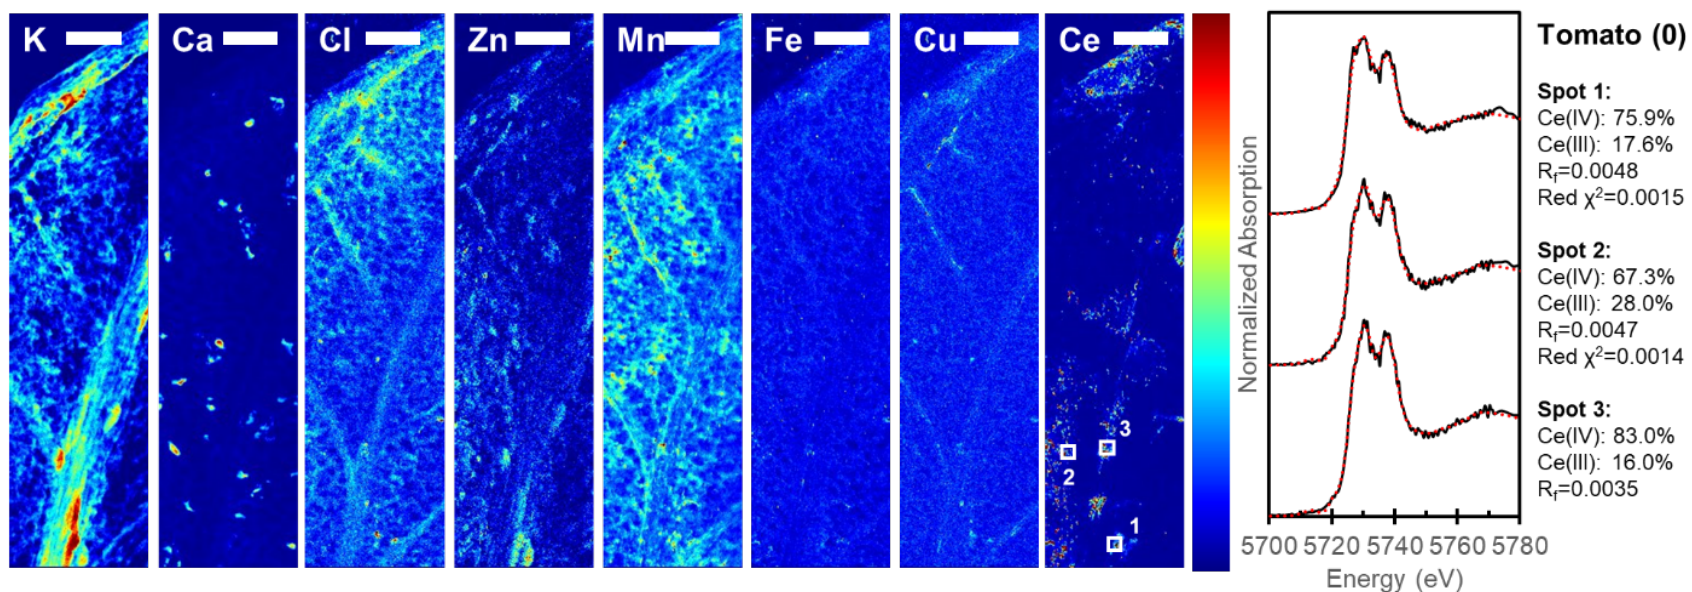

**Figure S10.** XRF maps showing elemental distributions in a tomato leaf after 48 h of hydroponic exposure to 50 mg-Ce/L as  $\text{CeO}_2(0)$ . Ce L(III)  $\mu$ -XANES spectra (solid, black) from high intensity spots are indicated with white boxes on the Ce map. LCF results (dotted, red) are presented with fitting statistics. Scale bar=200  $\mu\text{m}$ .

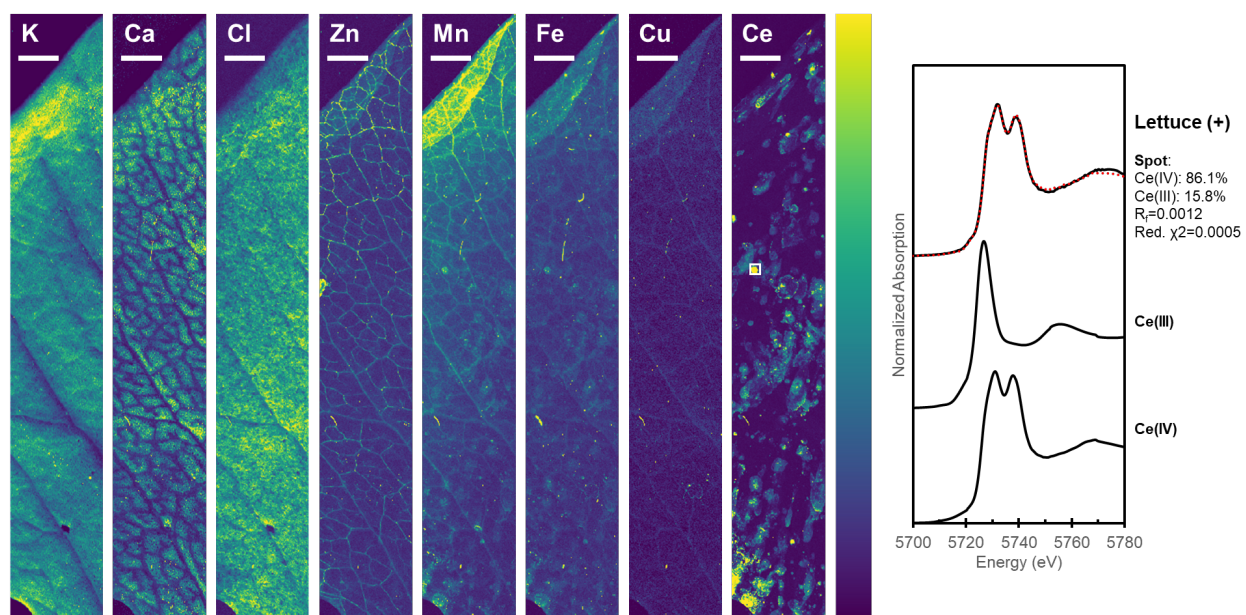

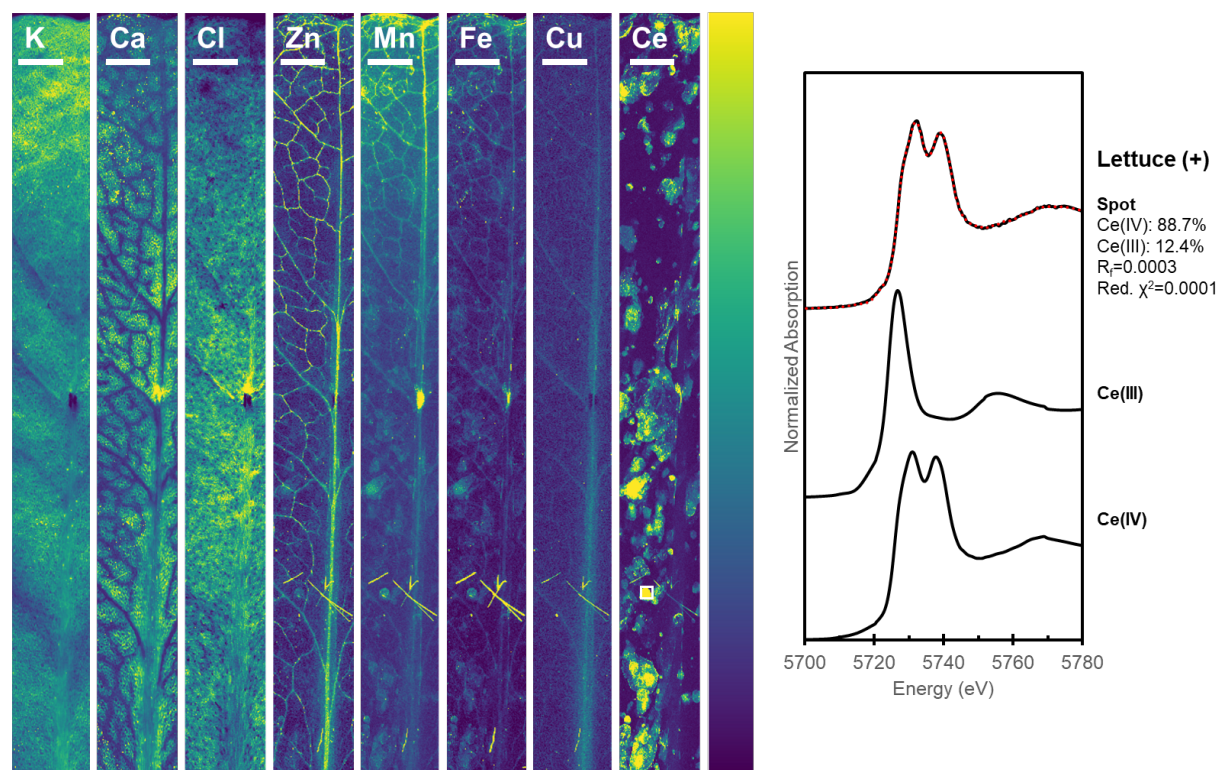

**Figure S12.** XRF maps showing elemental distributions in the central vein of a lettuce leaf after 48 h of hydroponic exposure to 50 mg-Ce/L as CeO<sub>2</sub> (+). Ce L(III)  $\mu$ -XANES spectrum (solid, black) from high intensity spot is indicated with a white box on the Ce map. LCF result (dotted, red) is presented with fitting statistics and Ce(III) and Ce(IV) model compounds. Scale bar= 1 mm.



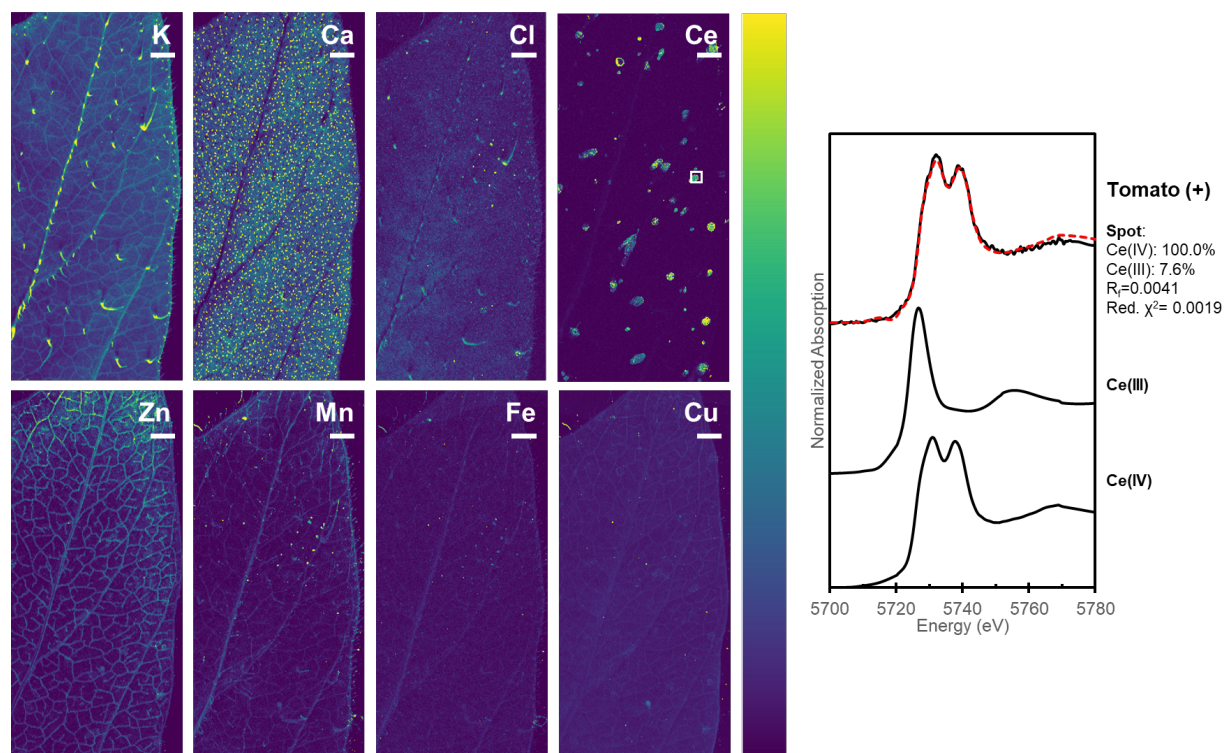

**Figure S13.** XRF maps showing elemental distributions in a tomato leaf after 48 h of hydroponic exposure to 50 mg-Ce/L as  $\text{CeO}_2$  (+). Ce L(III)  $\mu$ -XANES spectrum (solid, black) from high intensity spot is indicated with a white box on the Ce map. LCF result (dotted, red) is presented with fitting statistics and Ce(III) and Ce(IV) model compounds. Scale bar= 1 mm.

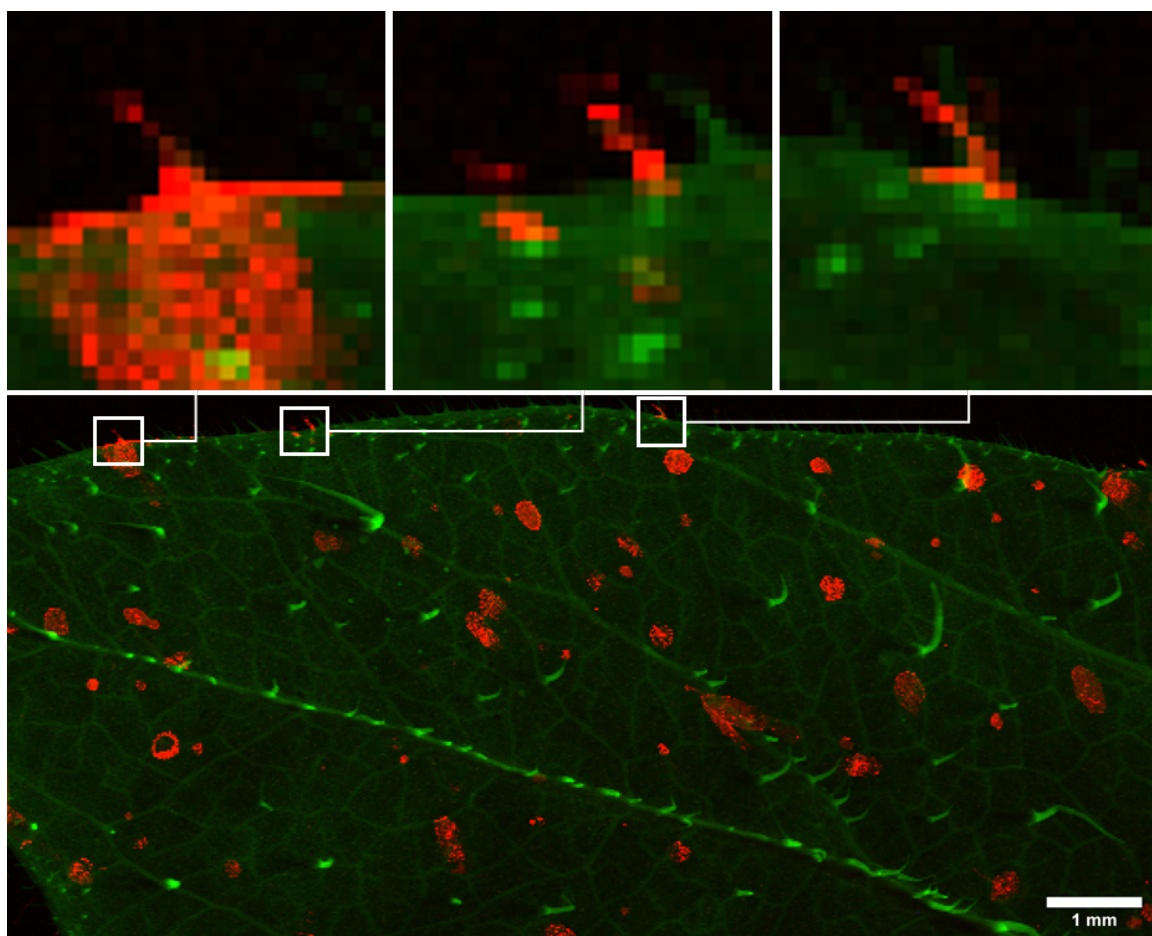

**Figure S14.** Dual-colored XRF map showing Ce (red) and K (green) distribution in a tomato leaf after 48 h of hydroponic exposure to 50 mg-Ce/L of  $\text{CeO}_2(+)$  NPs. White boxes (500  $\mu\text{m}$  x 500  $\mu\text{m}$ ) indicate Ce-trichome colocalization.
